# Supplementary material for: Linking leadership development programs for physicians with organization-level outcomes: a realist review
Source: Springer Nature journal article supplement (doi:10.1186/s12913-023-09811-y), 2023-07-21

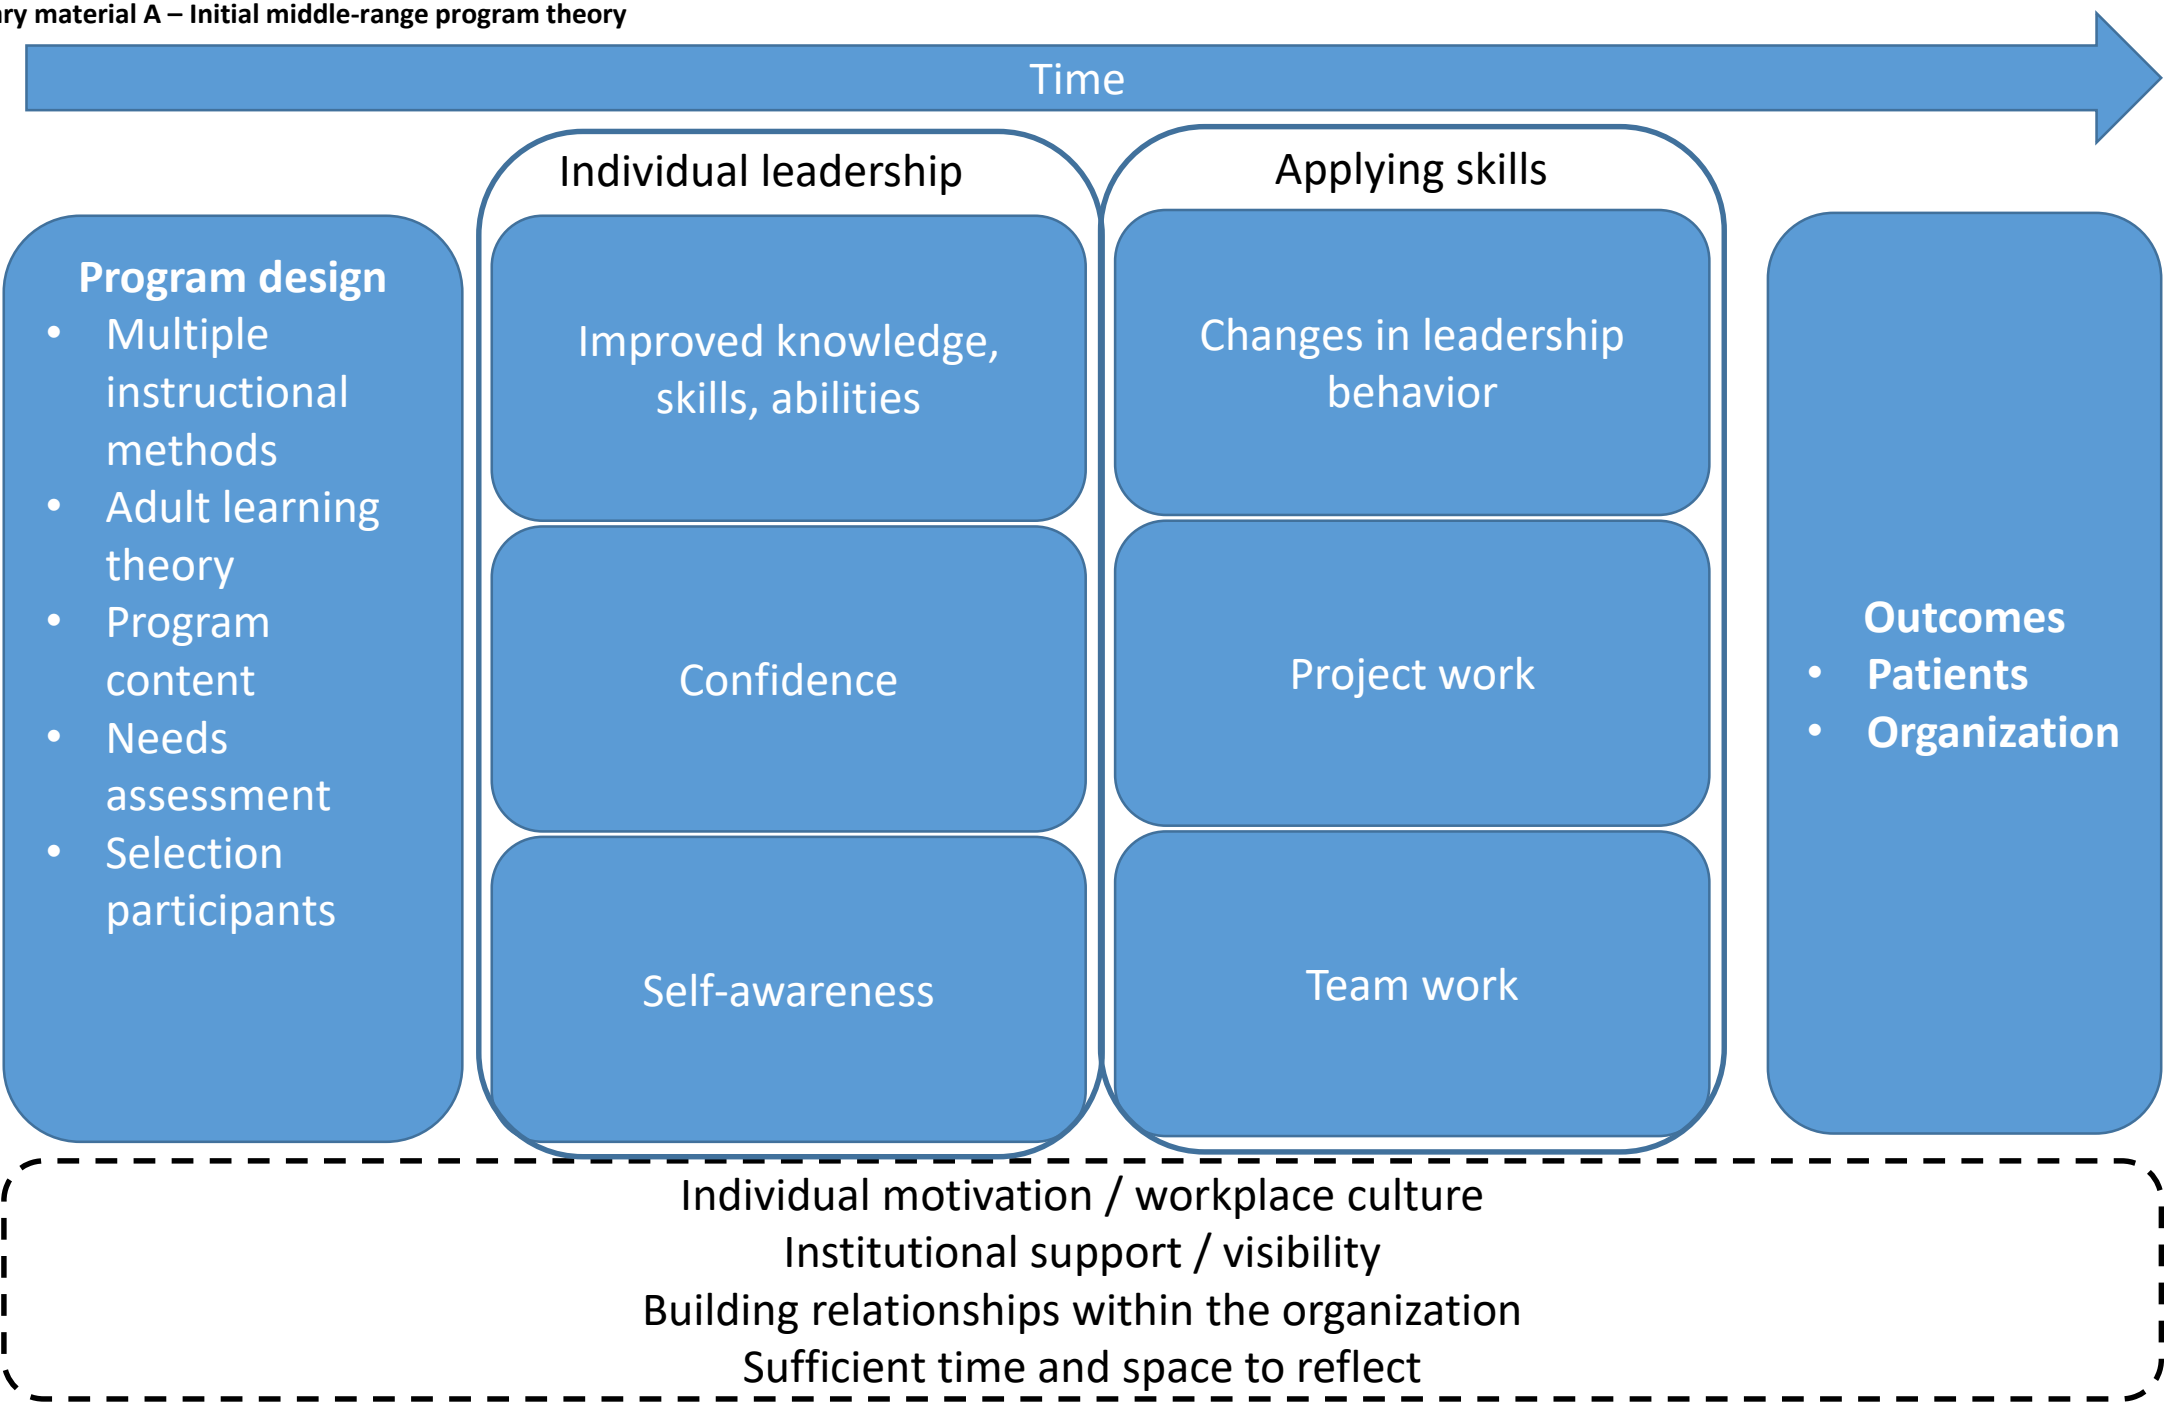

Supplement: MOESM1 [file 12913_2023_9811_MOESM1_ESM.pdf]
